# Supplementary material
Source: PubMed Central journal article supplement (PMC2527108)

Supplemental Fig. 1. *H. pylori*-induced MAPK activation in MKN28 cells can be abolished by specific MAPK inhibitors. MKN28 cells were pretreated with pharmacological inhibitors of MEK1/2 (PD98095, 50  $\mu$ M, Panel A), p38 (SB203580, 10  $\mu$ M, Panel B), JNK (JNK inhibitor II, 10  $\mu$ M, Panel C), or vehicle control (DMSO) (-) for 30 minutes and then co-cultured with the *H. pylori* strain J166 at MOI=100. Levels of phosphorylated protein were determined by Western blot analysis of whole cell lysates and were normalized to corresponding levels of GAPDH. Co-culture with *H. pylori* strain J166 induced the phosphorylation of ERK1/2 at 60 minutes (Panel A); MAPKAPK-2 at 5 minutes (Panel B); and c-jun at 60 minutes (Panel C). Pretreatment with MEK, p38, or JNK inhibitors abolished *H. pylori*-induced phosphorylation of each respective MAPK target.

**A**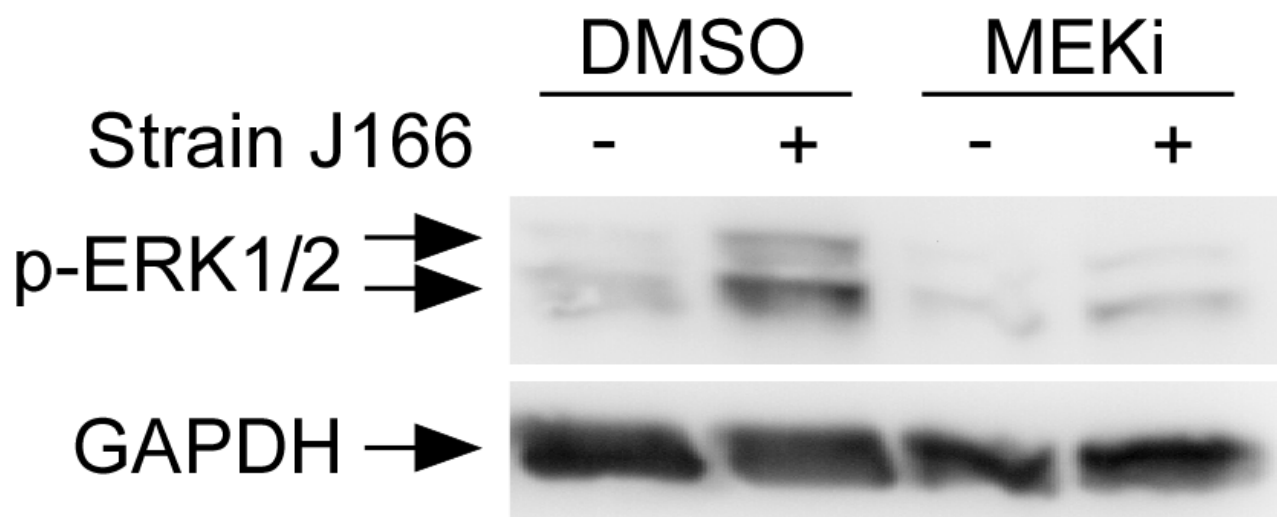**B**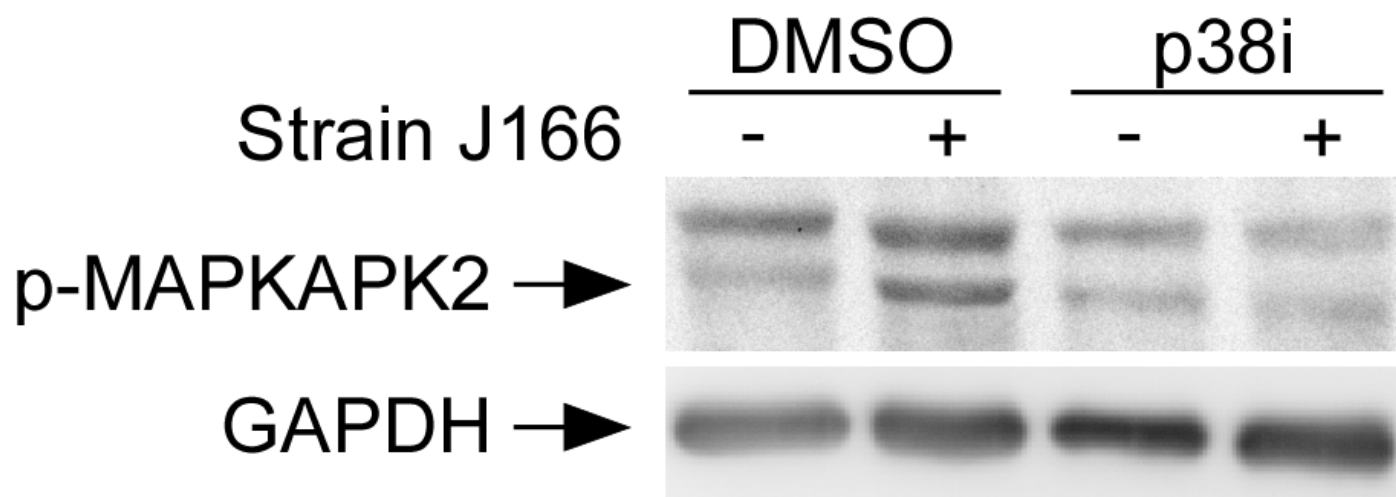**C**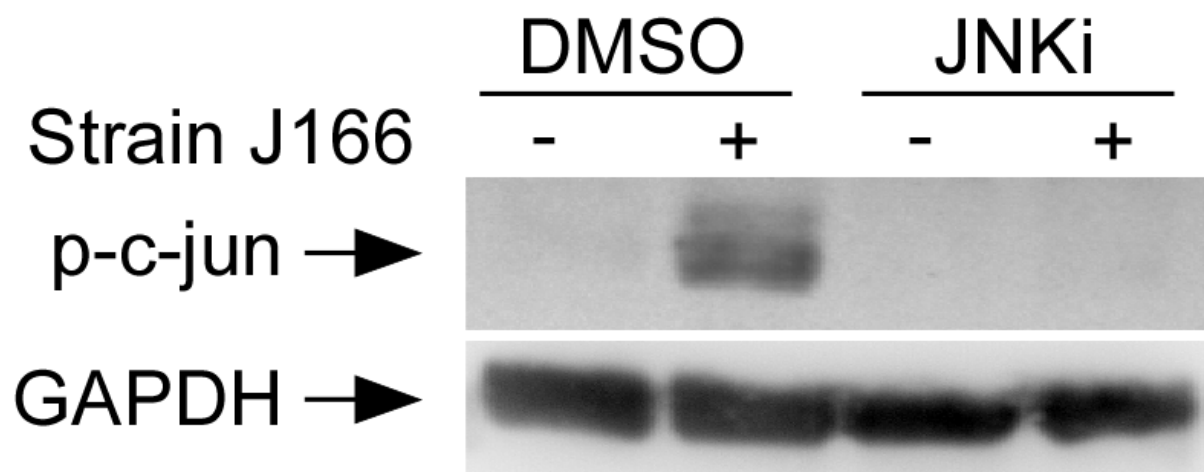

Supplement: supp_M801144200_Suppdata.pdf [file supp_M801144200_Suppdata.pdf]
